# Supplementary material for: SpCas9 activity prediction by DeepSpCas9, a deep learning-based model with unparalleled generalization performance
Source: bioRxiv or medRxiv preprint supplement (doi:10.1101/636472), 2019-05-15
Supplement: Supplementary file [file media-2.pdf]

**Supplementary Table 2.** Datasets used for this study. Datasets HT\_Cas9\_Train, HT\_Cas9\_Test contain the indel frequencies at integrated target sequences and were obtained from independent high-throughput experiments conducted in HEK293T cells. Indel frequencies at endogenous human coding and non-coding regions were included in dataset Endo\_Cas9.

| Data set name | Used genome editing tool | Data set generation method | Cell line | Data size (after filtering) | Target information                                                                               | Usage                                                                                       |
|---------------|--------------------------|----------------------------|-----------|-----------------------------|--------------------------------------------------------------------------------------------------|---------------------------------------------------------------------------------------------|
| HT_Cas9_Train | SpCas9                   | High-throughput experiment | HEK 293 T | 12,832                      | Integrated target sequences (sequences derived from human genome and random synthetic sequences) | Development of DeepCas9 and conventional machine learning-based models                      |
| HT_Cas9_Test  | SpCas9                   | High-throughput experiment | HEK 293 T | 542                         | Integrated target sequences (sequences derived from human genome and random synthetic sequences) | Comparison of indel frequencies at endogenous and corresponding integrated target sequences |
| Endo_Cas9     | SpCas9                   | Individual experiments     | HEK 293 T | 124                         | Endogenous target sites (human coding and non-coding regions)                                    | Fine-tuning, model evaluation                                                               |
